# Supplementary material for: Conformal 3D Li/Li13Sn5 Scaffolds Anodes for High‐Areal Energy Density Flexible Lithium Metal Batteries
Source: PubMed Central journal article supplement (PMC11005696; doi:10.1002/advs.202309254), 2024-02-07
Supplement: ADVS-11-2309254-s002.pdf [file ADVS-11-2309254-s002.pdf]

## Supporting Information

for *Adv. Sci.*, DOI 10.1002/adv.202309254

Conformal 3D Li/Li<sub>13</sub>Sn<sub>5</sub> Scaffolds Anodes for High-Areal Energy Density Flexible Lithium Metal Batteries

*Xiaomei Huo, Xin Gong, Yuhang Liu, Yonghui Yan, Zhuzhu Du and Wei Ai\**

## Supporting Information

**Conformal 3D Li/Li<sub>13</sub>Sn<sub>5</sub> Scaffolds Anodes for High-Areal Energy Density Flexible Lithium Metal Batteries**

*Xiaomei Huo, Xin Gong, Yuhang Liu, Yonghui Yan, Zhuzhu Du and Wei Ai\**

Frontiers Science Center for Flexible Electronics & Xi'an Institute of Flexible Electronics,  
Northwestern Polytechnical University, Xi'an 710072, China.

E-mail: iamwai@nwpu.edu.cn

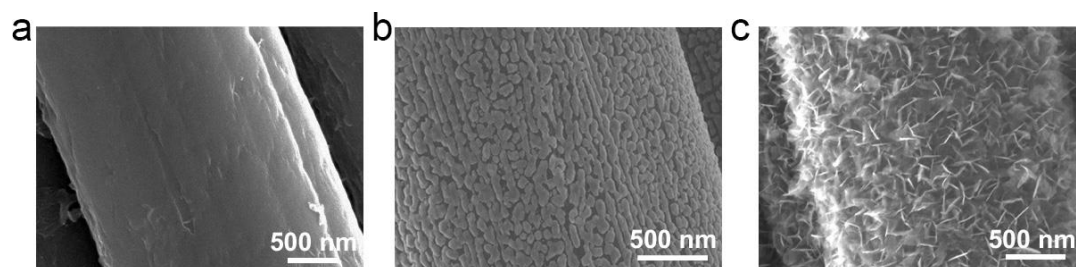

**Figure S1.** SEM images of (a) pristine CC, (b) R-SnO<sub>2</sub>@CC and (c) F-SnO<sub>2</sub>@CC.

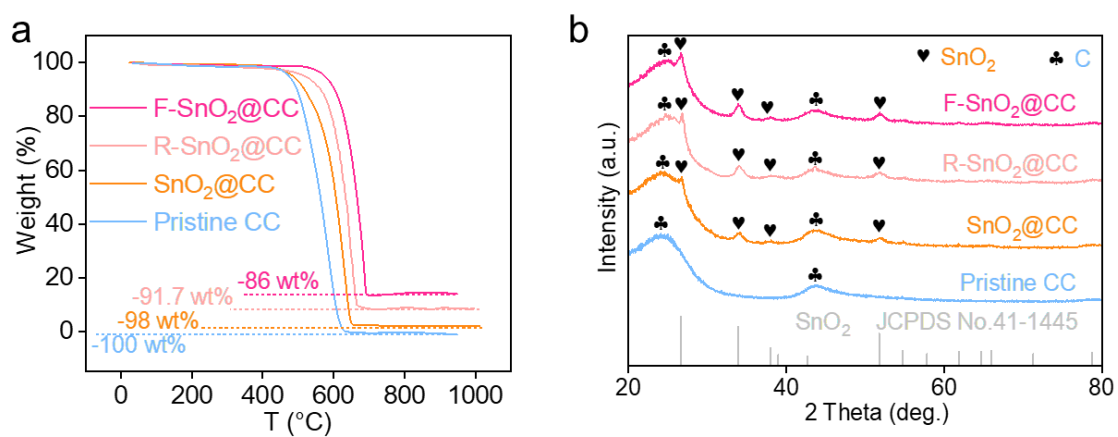

**Figure S2.** (a) TGA curves of pristine CC, SnO<sub>2</sub>@CC, R-SnO<sub>2</sub>@CC and F-SnO<sub>2</sub>@CC. (b) XRD patterns of pristine CC, SnO<sub>2</sub>@CC, R-SnO<sub>2</sub>@CC and F-SnO<sub>2</sub>@CC in comparison with the standard diffraction peaks for rutile SnO<sub>2</sub> (JCPDS No. 41-1445).

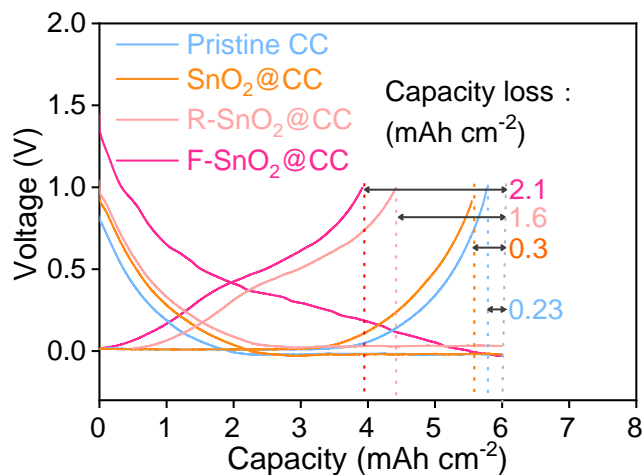

**Figure S3.** Capacity-voltage curves of pristine CC, SnO<sub>2</sub>@CC, R-SnO<sub>2</sub>@CC and F-SnO<sub>2</sub>@CC electrodes plated at 0.5 mA cm<sup>-2</sup> for 6 mAh cm<sup>-2</sup> and stripped to 1 V cut-off voltage.

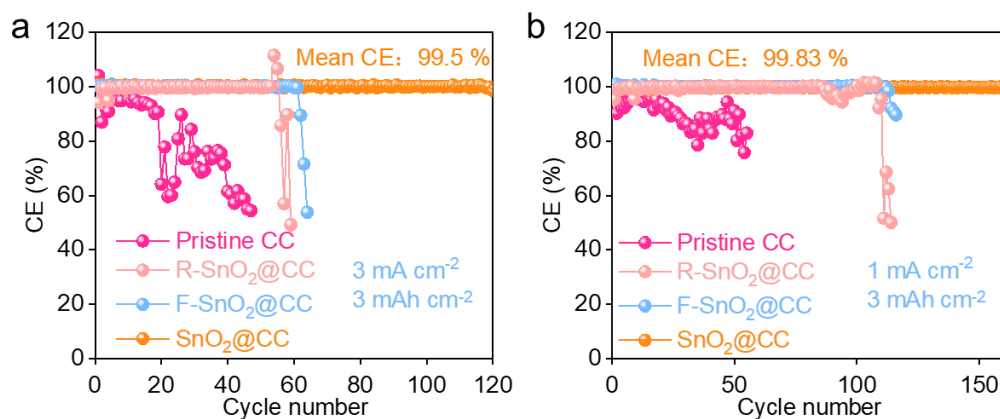

**Figure S4.** Coulombic efficiency of the pristine CC, SnO<sub>2</sub>@CC, R-SnO<sub>2</sub>@CC and F-SnO<sub>2</sub>@CC electrodes at (a) 3 mA cm<sup>-2</sup> for 3 mAh cm<sup>-2</sup> and (b) 1 mA cm<sup>-2</sup> for 3 mAh cm<sup>-2</sup>.

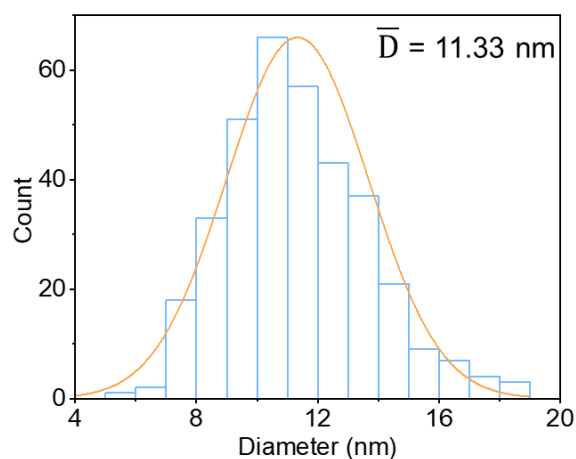

**Figure S5.** The particle size distribution curve of SnO<sub>2</sub> on CC.

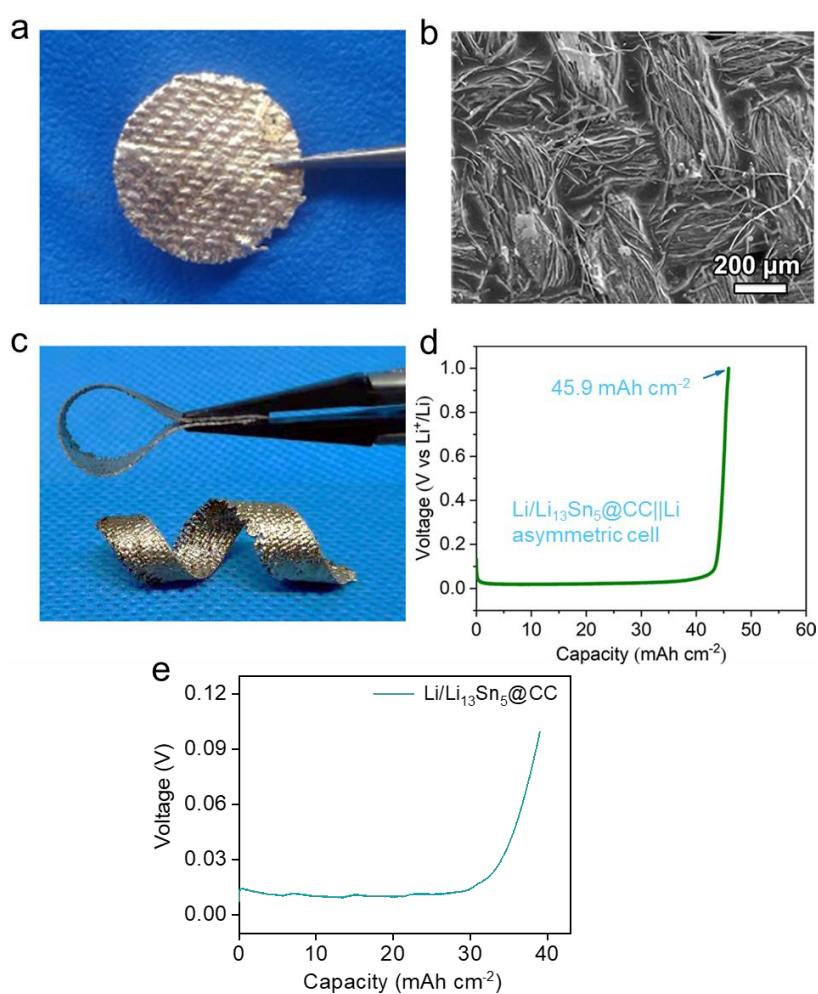

**Figure S6.** (a) Optical and (b) SEM images of Li/Li<sub>13</sub>Sn<sub>5</sub>@CC. (c) Optical images showing the twisting and bending of Li/Li<sub>13</sub>Sn<sub>5</sub>@CC. (d) Capacity-voltage curve of the Li/Li<sub>13</sub>Sn<sub>5</sub>@CC electrode after fully Li stripping. (e) Capacity-voltage curve of the Li/Li<sub>13</sub>Sn<sub>5</sub>@CC electrode after Li stripping to 0.1V.

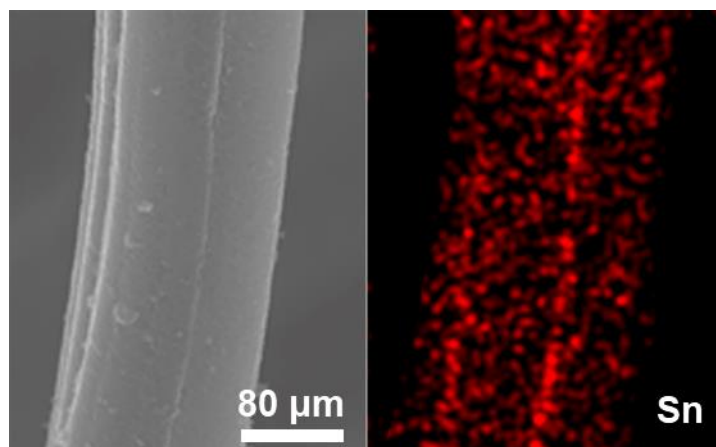

**Figure S7.** SEM and the Sn elemental mapping images of Li/Li<sub>13</sub>Sn<sub>5</sub>@CC electrode after Li stripping.

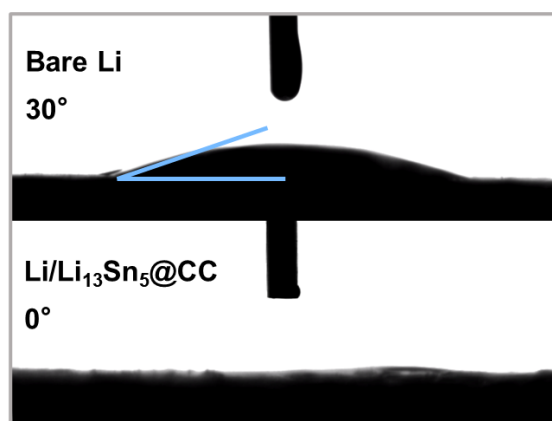

**Figure S8.** Contact angle test of bare Li and Li/Li<sub>13</sub>Sn<sub>5</sub>@CC electrode.

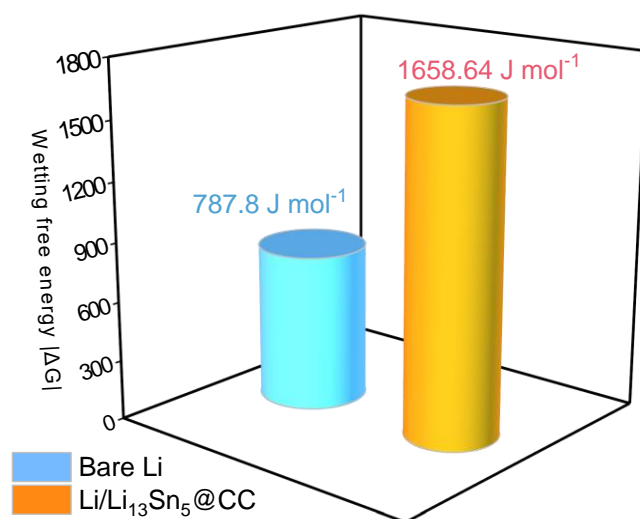

**Figure S9.** The wetting free energy of bare Li and Li/Li<sub>13</sub>Sn<sub>5</sub>@CC electrode.

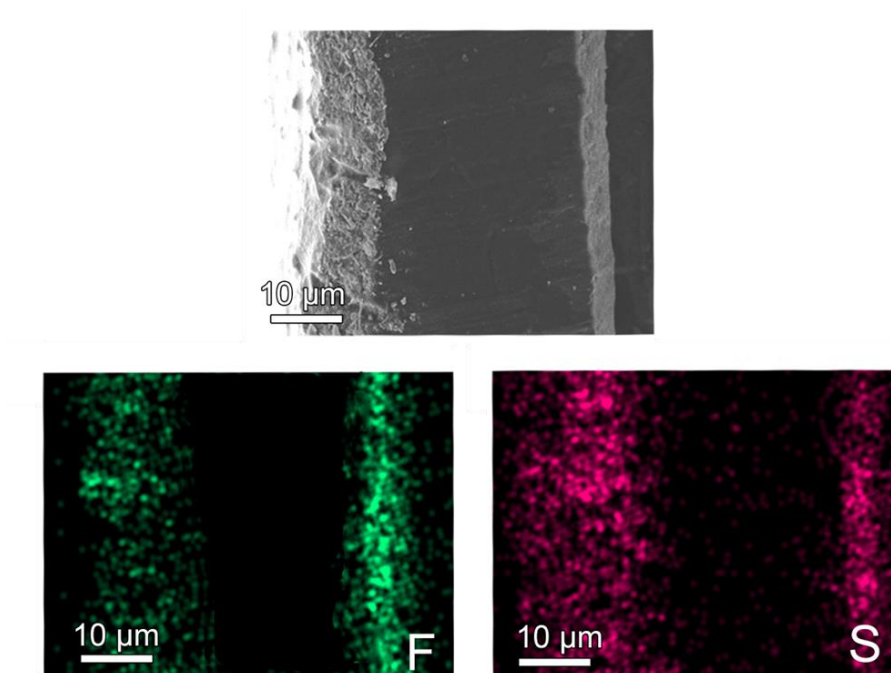

**Figure S10.** Cross-section SEM image of bare Li and its F and S elemental mappings.

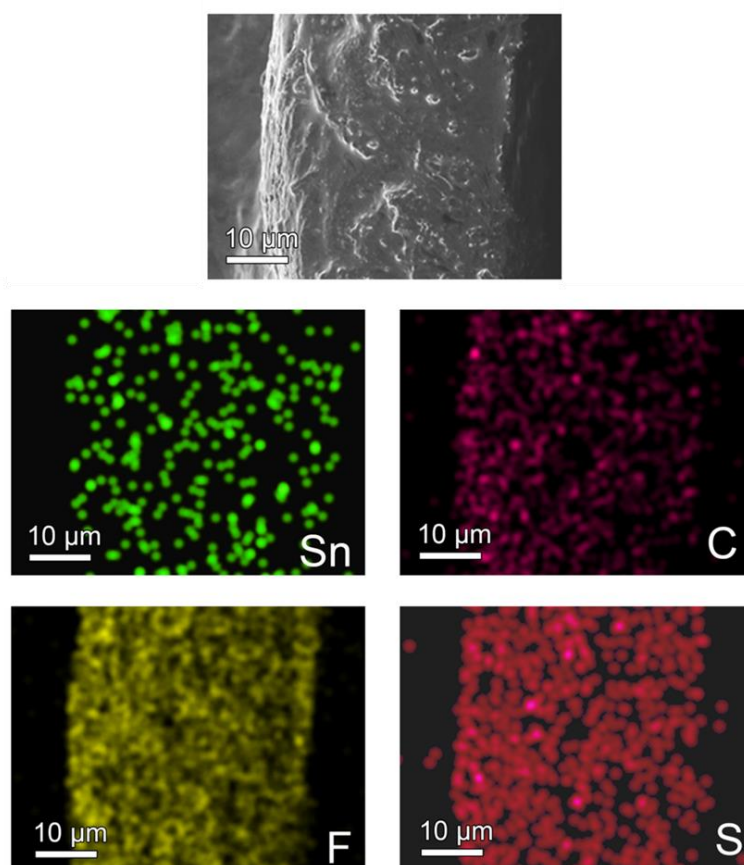

**Figure S11.** Cross-section SEM image of Li/Li<sub>13</sub>Sn<sub>5</sub>@CC and its Sn, C, F and S elemental mappings.

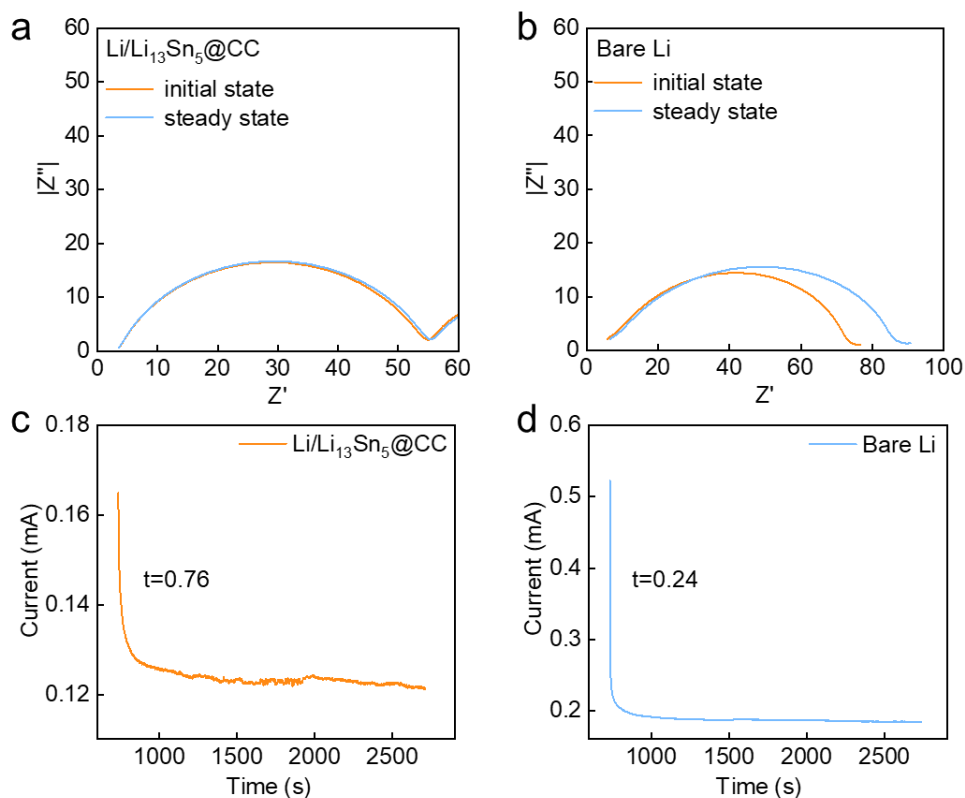

**Figure S12.** (a, b) EIS curves and (c, d) the associated current variation with time during polarization of Li/Li<sub>13</sub>Sn<sub>5</sub>@CC and bare Li symmetrical cells with applied potential difference of 10 mV.

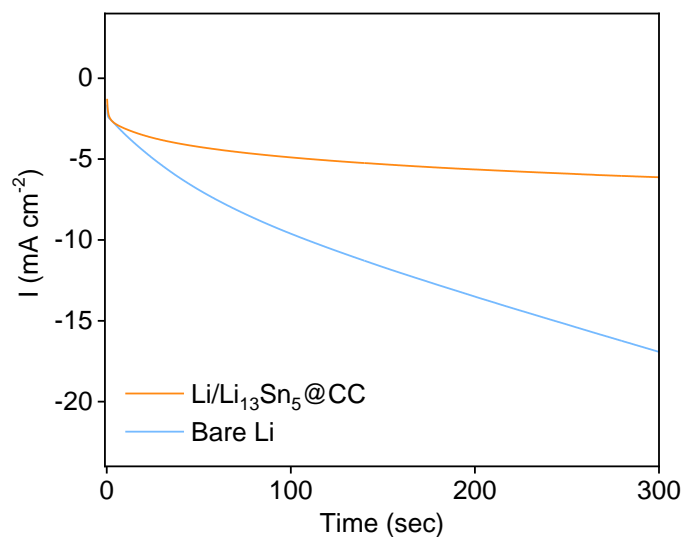

**Figure S13.** Chronoamperometry curves of Li/Li<sub>13</sub>Sn<sub>5</sub>@CC and bare Li at an overpotential of -150 mV.

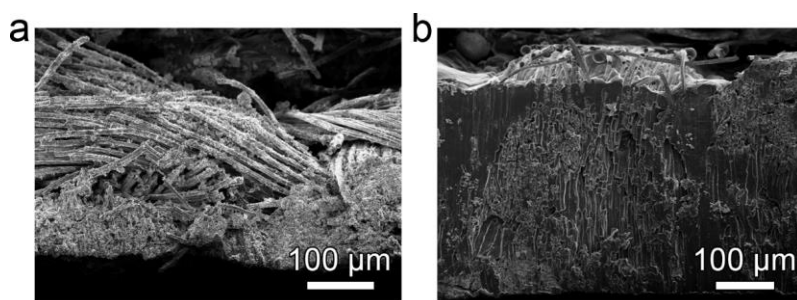

**Figure S14.** Cross-section SEM image of Li/Li<sub>13</sub>Sn<sub>5</sub>@CC after (a) 40 mAh cm<sup>-2</sup> Li stripping and (b) 40 mAh cm<sup>-2</sup> Li replating (87.1% DOD).

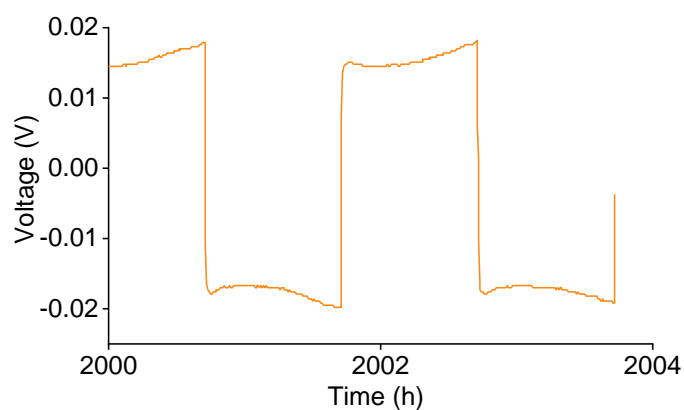

**Figure S15.** Enlarged voltage-time curves of cycling at 5 mA cm<sup>-2</sup> for 5 mAh cm<sup>-2</sup>.

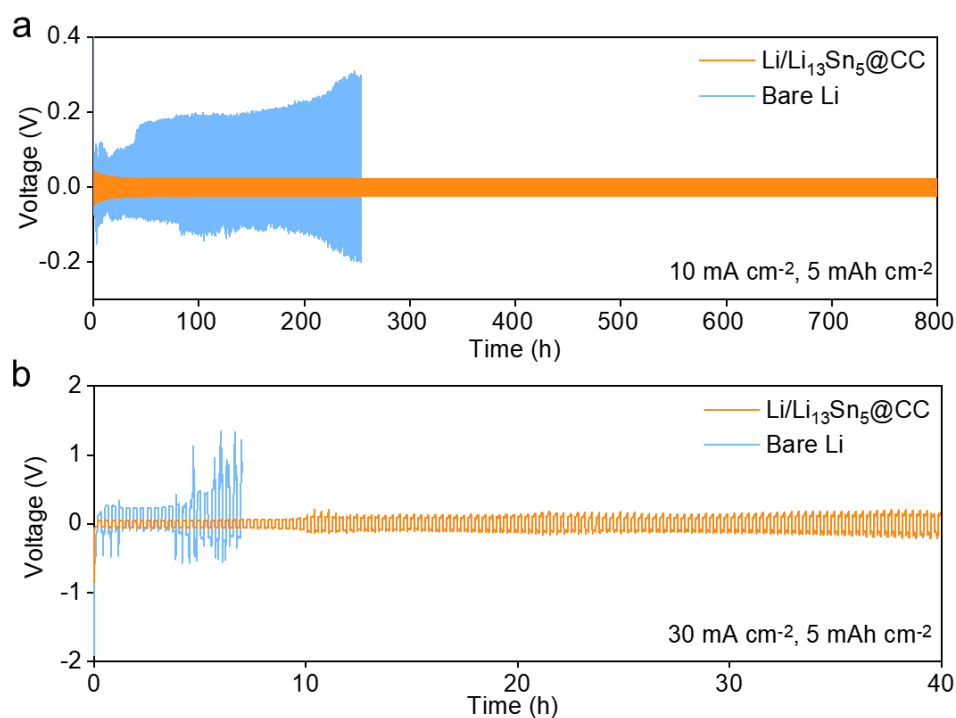

**Figure S16.** Cycling performance of Li/Li<sub>13</sub>Sn<sub>5</sub>@CC and bare Li symmetric cells at (a) 10 mA cm<sup>-2</sup> and (b) 30 mA cm<sup>-2</sup> with a fixed capacity of 5 mAh cm<sup>-2</sup>.



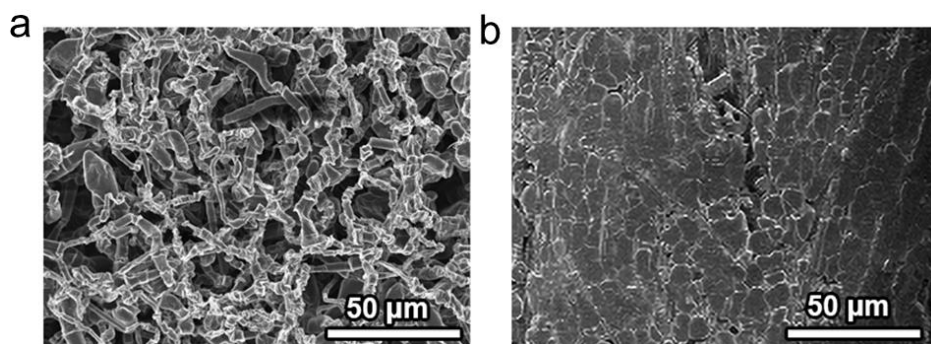

**Figure S17.** SEM images of (a) bare Li and (b) Li/Li<sub>13</sub>Sn<sub>5</sub>@CC after 50 cycles test at 30 mA cm<sup>-2</sup> and 5 mAh cm<sup>-2</sup>.

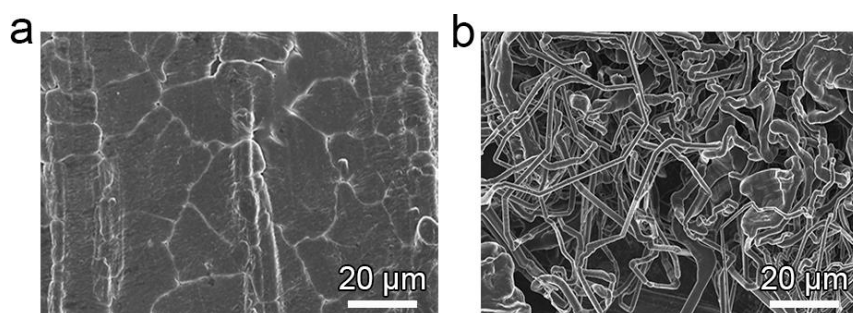

**Figure S18.** SEM images of (a) Li/Li<sub>13</sub>Sn<sub>5</sub>@CC after cycles of 2600 h and (b) bare Li after cycles of 700 h at 5 mA cm<sup>-2</sup> and 5 mAh cm<sup>-2</sup>.

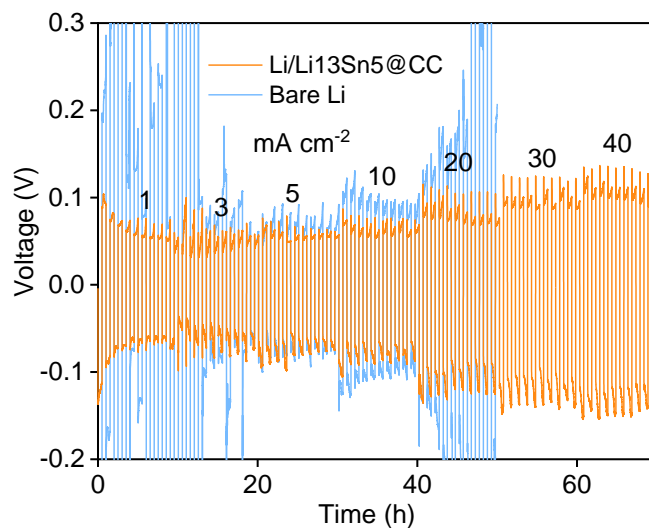

**Figure S19.** Rate performance of the symmetrical cells.

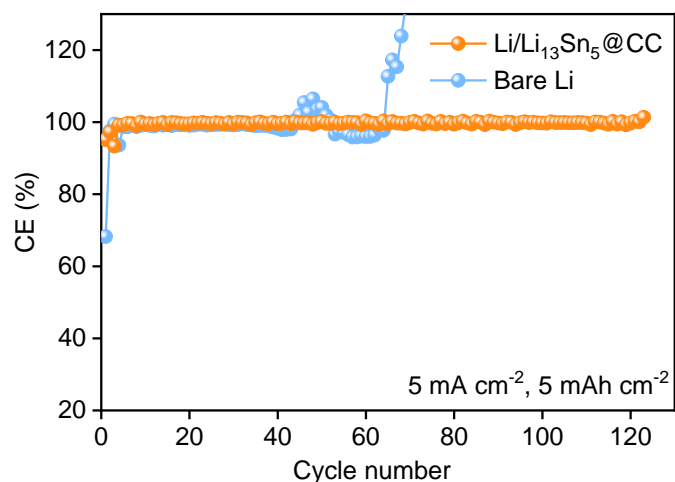

**Figure S20.** Coulombic efficiency of the Li/Li<sub>13</sub>Sn<sub>5</sub>@CC and bare Li electrodes at 5 mA cm<sup>-2</sup> for 5 mAh cm<sup>-2</sup>.

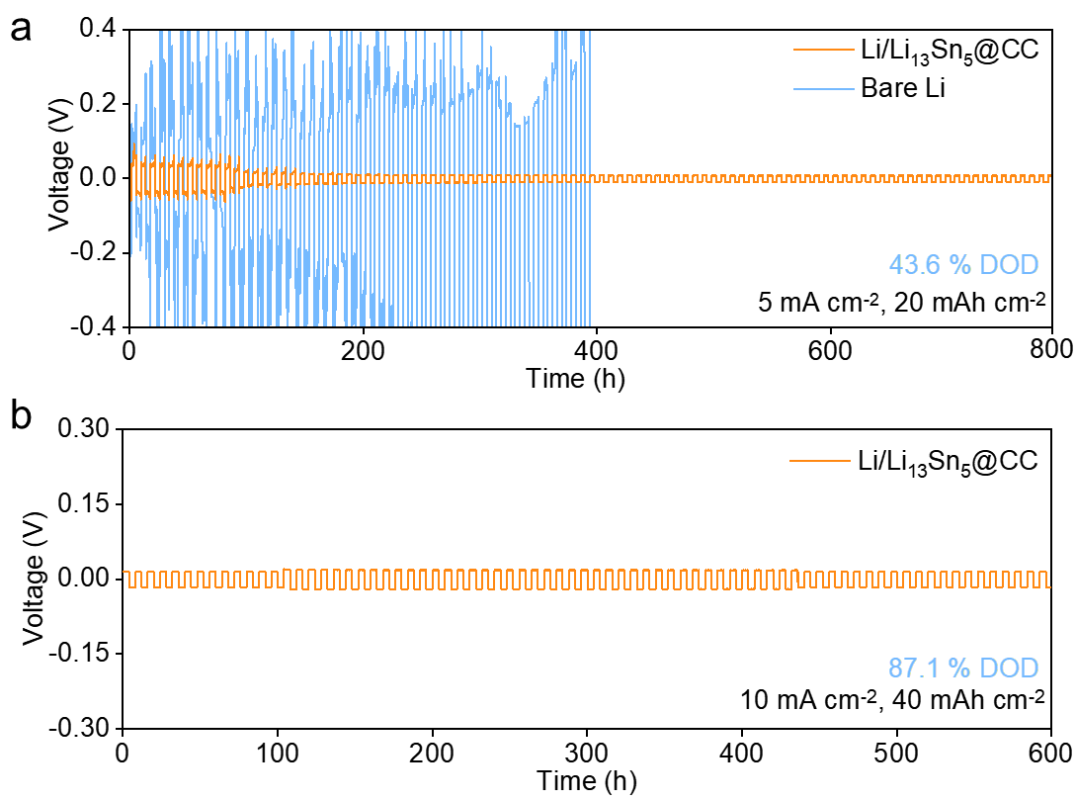

**Figure S21.** Cycling performance of Li/Li<sub>13</sub>Sn<sub>5</sub>@CC and bare Li symmetric cells at 5 mA cm<sup>-2</sup> with a fixed capacity of (a) 20 mAh cm<sup>-2</sup> and (b) 10 mA cm<sup>-2</sup> with a fixed capacity of 40 mAh cm<sup>-2</sup>.

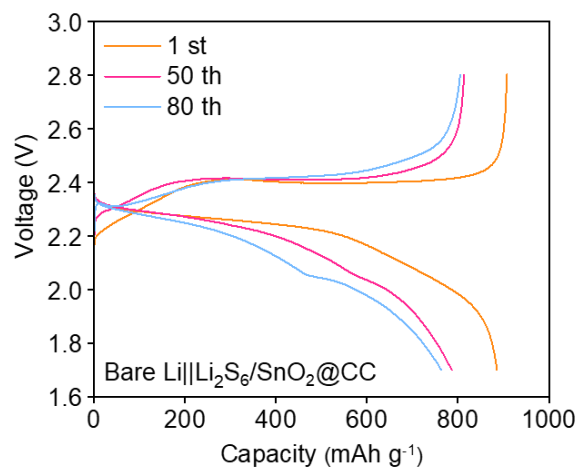

**Figure S22.** Charge-discharge voltage curves of bare Li||Li<sub>2</sub>S<sub>6</sub>/SnO<sub>2</sub>@CC cell at different cycles.

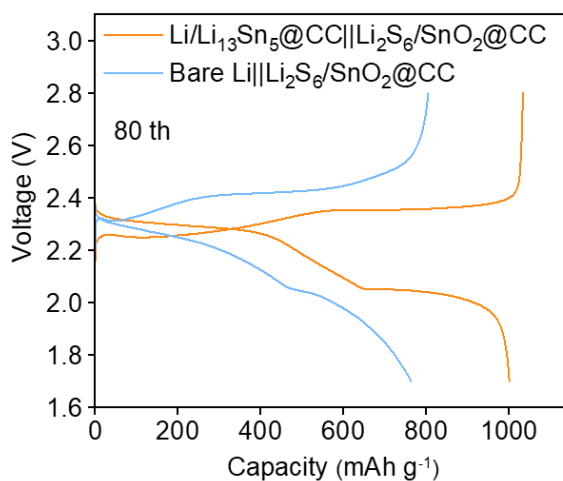

**Figure S23.** Comparison of Charge-discharge voltage curves of bare Li||Li<sub>2</sub>S<sub>6</sub>/SnO<sub>2</sub>@CC and Li/Li<sub>13</sub>Sn<sub>5</sub>@CC||Li<sub>2</sub>S<sub>6</sub>/SnO<sub>2</sub>@CC cells at 80th cycle.

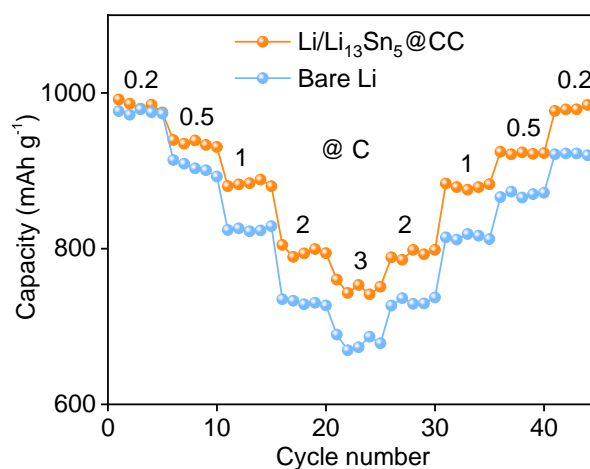

**Figure S24.** Rate capacities of Li/Li<sub>13</sub>Sn<sub>5</sub>@CC||Li<sub>2</sub>S<sub>6</sub>/SnO<sub>2</sub>@CC and Li||Li<sub>2</sub>S<sub>6</sub>/SnO<sub>2</sub>@CC batteries at various current rates from 0.2 C to 3 C.

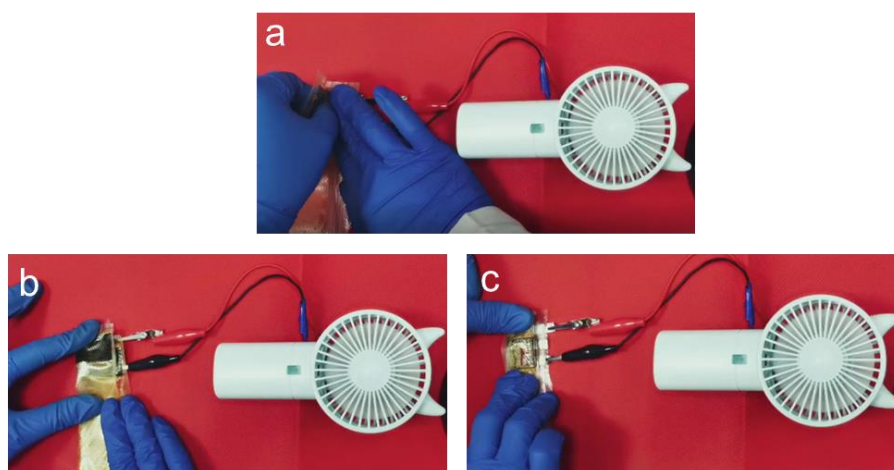

**Figure S25.** The Li/Li<sub>13</sub>Sn<sub>5</sub>@CC||Li<sub>2</sub>S<sub>6</sub>/SnO<sub>2</sub>@CC pouch cell powering electric fans under (a) 90° bending, (b) one folding and (c) two folding states, respectively.

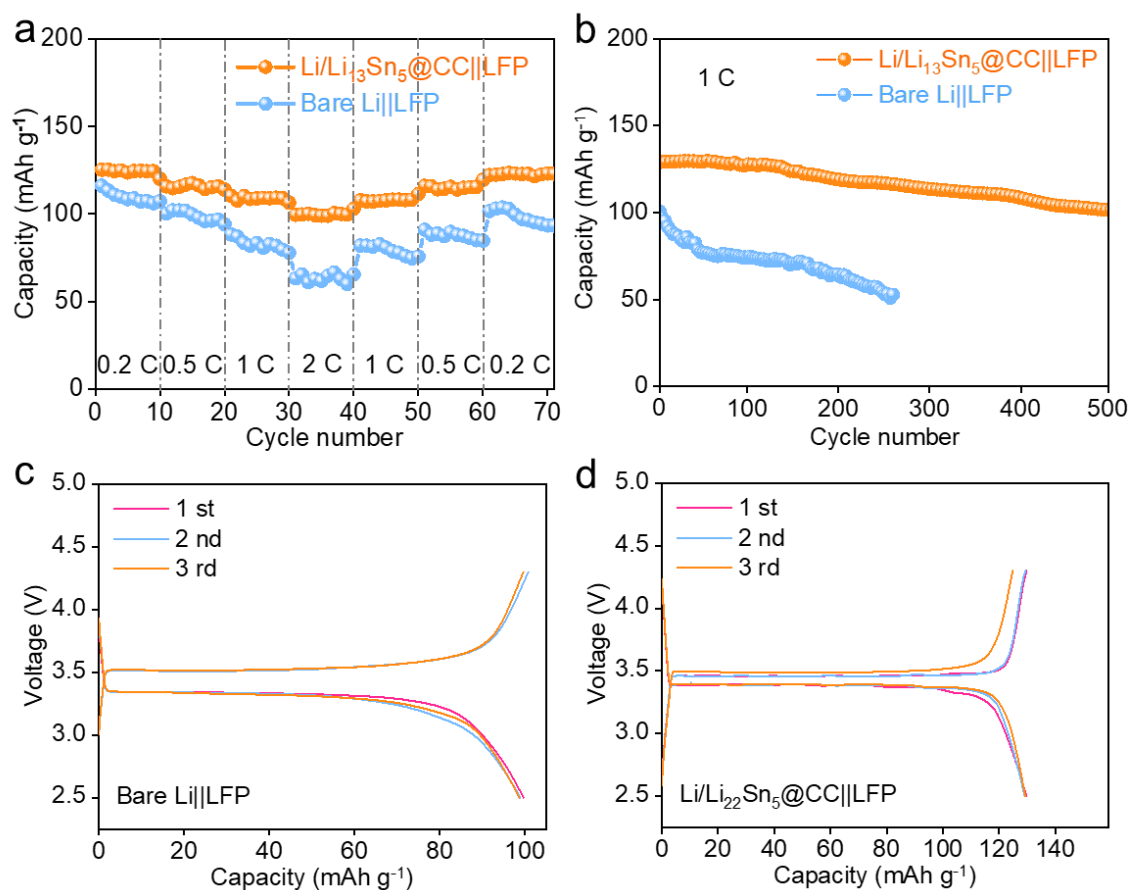

**Figure S26.** Electrochemical performance of full cell. (a) Rate performance. (b) Cycling performance at 1 C. Charge-discharge voltage curves of (c) bare Li||LFP full cell and (d) Li/Li<sub>13</sub>Sn<sub>5</sub>@CC||LFP full cell at different cycles.

**Table S1.** The actual weight change after molten Li infusion.

|                                                    | Pristine CC | SnO <sub>2</sub> @CC | R-SnO <sub>2</sub> @CC | F-SnO <sub>2</sub> @CC |
|----------------------------------------------------|-------------|----------------------|------------------------|------------------------|
| Pre-lithiation capacity<br>(mAh cm <sup>-2</sup> ) | 2.1         | 2.3                  | 2.7                    | 6                      |
| Irreversible capacity (mAh cm <sup>-2</sup> )      | 0.23        | 0.3                  | 1.6                    | 2.1                    |

**Table S2.** Comparison of symmetric cell with the recently reported Sn-based LMAs.

| Types             | Electrode                               | Current density<br>(mA cm <sup>-2</sup> ) | Areal capacity<br>(mAh cm <sup>-2</sup> ) | Cycles | Voltage hysteresis<br>(mV) | Sn-containing<br>(%) | Ref.      |
|-------------------|-----------------------------------------|-------------------------------------------|-------------------------------------------|--------|----------------------------|----------------------|-----------|
| 3D-host materials | Li/Li <sub>13</sub> Sn <sub>5</sub> @CC | 5                                         | 5                                         | 1000   | 31.6                       | 2                    | This work |
|                   |                                         | 30                                        | 5                                         | 100    | 192                        |                      |           |
|                   |                                         | 5                                         | 20                                        | 100    | 21                         |                      |           |
|                   |                                         | 10                                        | 30                                        | 100    | 19.2                       |                      |           |
|                   | Li-Li <sub>x</sub> Sn@CF                | 1                                         | 1                                         | 372    | 20                         | 50                   | 1         |
|                   |                                         | 3                                         | 1                                         | 180    | 160                        |                      |           |
|                   | Li-Li <sub>x</sub> Sn@CT                | 1                                         | 1                                         | 110    | 20                         | 2.5                  | 2         |
|                   |                                         | 3                                         | 1                                         | 55     | 40                         |                      |           |
|                   | Li-Li <sub>x</sub> Sn@CP                | 1                                         | 1                                         | 400    | 18                         | 30                   | 3         |
|                   |                                         | 2                                         | 1                                         | 250    | 20                         |                      |           |
|                   |                                         | 5                                         | 1                                         | 100    | 120                        |                      |           |
|                   | Sn/C/Li                                 | 1                                         | 1                                         | 900    | 15                         | 25                   | 4         |
|                   |                                         | 2                                         | 1                                         | 1200   | 22                         |                      |           |
|                   |                                         | 5                                         | 1                                         | 700    | 60                         |                      |           |
|                   | Li-Sn@NF                                | 5                                         | 5                                         | 100    | 9.5                        | 5                    | 5         |
|                   |                                         | 10                                        | 5                                         | 200    | 27                         |                      |           |
|                   |                                         | 3                                         | 1                                         | 300    | 100                        |                      |           |
|                   |                                         | 10                                        | 1                                         | 1000   | 200                        |                      |           |
|                   | Li-Co@CS                                | 1                                         | 1                                         | 400    | 50                         | /                    | 6         |
|                   |                                         | 20                                        | 1                                         | 600    | 20                         |                      |           |
| 1                 |                                         | 3                                         | 120                                       | 280    |                            |                      |           |
| Li-Mn/G foam      | 1                                       | 1                                         | 800                                       | 30     | /                          | 7                    |           |
|                   | 2                                       | 1                                         | 300                                       | 12     |                            |                      |           |
| Li@Cu             | 1                                       | 1                                         | 800                                       | 12     | /                          | 8                    |           |
|                   | 1                                       | 6                                         | 200                                       | 15     |                            |                      |           |
|                   | 5                                       | 1                                         | 150                                       | 60     |                            |                      |           |
| Li-N@CF           | 1                                       | 1                                         | 300                                       | 30     | /                          | 9                    |           |
|                   | 3                                       | 1                                         | 270                                       | 50     |                            |                      |           |
| Layered Li-rGO    | 1                                       | 1                                         | 100                                       | 100    | /                          | 10                   |           |
|                   | 3                                       | 1                                         | 46                                        | 200    |                            |                      |           |
| Protective layer  | Li <sub>3</sub> Mg <sub>7</sub> @Li     | 0.5                                       | 1                                         | 1000   | 11                         | /                    | 11        |
|                   |                                         | 2                                         | 1                                         | 900    | 15                         |                      |           |

|                       |     |   |      |     |   |    |
|-----------------------|-----|---|------|-----|---|----|
|                       | 1   | 5 | 85   | 20  |   |    |
| PTMEG@Li              | 1   | 1 | 500  | 10  | / | 12 |
|                       | 1   | 1 | 400  | 20  |   |    |
| Li <sub>x</sub> Sn@Li | 3   | 1 | 150  | 50  | / | 13 |
|                       | 5   | 1 | 250  | 100 |   |    |
| Li <sub>2</sub> S@Li  | 5   | 2 | 937  | 20  | / | 14 |
|                       | 0.5 | 1 | 1000 | 150 |   |    |
| LiF@Li                | 1   | 1 | 280  | 200 | / | 15 |
|                       | 2   | 1 | 500  | 350 |   |    |

**Table S3.** Comparison of Li/Li<sub>13</sub>Sn<sub>5</sub>@CC||Li<sub>2</sub>S<sub>6</sub>/SnO<sub>2</sub>@CC||Li/Li<sub>13</sub>Sn<sub>5</sub>@CC cell under various deformation states with previously reported Li||S cells

| Cell                                                                                          | S loading (mg cm <sup>-2</sup> ) | Current density (mA cm <sup>-2</sup> ) | Areal capacity (mAh cm <sup>-2</sup> ) | Areal energy density (mWh cm <sup>-2</sup> ) | Ref.             |
|-----------------------------------------------------------------------------------------------|----------------------------------|----------------------------------------|----------------------------------------|----------------------------------------------|------------------|
| Li/Li <sub>13</sub> Sn <sub>5</sub> @CC  Li <sub>2</sub> S <sub>6</sub> /SnO <sub>2</sub> @CC | <b>6.33</b>                      | <b>1.06</b>                            | <b>5.04</b>                            | <b>10.6</b>                                  | <b>This work</b> |
| LV/Li-S                                                                                       | 2                                | 1.68                                   | 2.64                                   | 2.59                                         | 16               |
| Li/CuCF-NSHG/S/NiCF                                                                           | 3.2                              | 1                                      | 2                                      | 4.2                                          | 17               |
| Li-HMSC                                                                                       | 7.26                             | 1                                      | 4                                      | 8.2                                          | 18               |
| LiCSMF-S/CSMF                                                                                 | 1.28                             | 2                                      | 0.9                                    | 1.89                                         | 19               |
| Li/CC-Graphene/S                                                                              | 5.1                              | 4.27                                   | 4                                      | 8.2                                          | 20               |

## Reference

- [1] Y. Zhang, C. W. Wang, G. Pastel, Y. D. Kuang, H. Xie, Y. J. Li, B. Y. Liu, W. Luo, C. J. Chen, L. B. Hu, *Adv. Energy Mater.* **2018**, *8*, 1800635.
- [2] W. S. Xiong, Y. Xia, Y. Jiang, Y. Qi, W. Sun, D. He, Y. Liu, X. Z. Zhao, *ACS Appl. Mater. Interfaces* **2018**, *10*, 21254.
- [3] L. Tan, S. H. Feng, X. H. Li, Z. X. Wang, W. J. Peng, T. C. Liu, G. C. Yan, L. J. Li, F. X. Wu, J. X. Wang, *Chem. Eng. J.* **2020**, *394*, 124848.
- [4] H. Qiu, T. Tang, M. Asif, W. Li, T. Zhang, Y. Hou, *Nano Energy* **2019**, *65*, 103989.
- [5] Y. Xia, Y. Jiang, Y. Y. Qi, W. Q. Zhang, Y. Wang, S. F. Wang, Y. M. Liu, W. W. Sun, X. Z. Zhao, *J. Power Sources* **2019**, *442*, 227214.
- [6] S. Li, Q. Liu, J. Zhou, T. Pan, L. Gao, W. Zhang, L. Fan, Y. Lu, *Adv. Funct. Mater.* **2019**, *29*, 1808847.
- [7] B. Z. Yu, T. Tao, S. Mateti, S. G. Lu, Y. Chen, *Adv. Funct. Mater.* **2018**, *28*, 1803023.

- [8] S. Huang, L. Chen, T. Wang, J. Hu, Q. Zhang, H. Zhang, C. Nan, L. Z. Fan, *Nano Lett.* **2021**, *21*, 791.
- [9] L. Tao, A. Hu, Z. Yang, Z. Xu, C. E. Wall, A. R. Esker, Z. Zheng, F. Lin, *Adv. Funct. Mater.* **2020**, *30*, 2000585.
- [10] D. Lin, Y. Liu, Z. Liang, H. W. Lee, J. Sun, H. Wang, K. Yan, J. Xie, Y. Cui, *Nat. Nanotechnol.* **2016**, *11*, 626.
- [11] H. Zhang, S. Ju, G. Xia, D. Sun, X. Yu, *Adv. Funct. Mater.* **2021**, *31*, 2009712.
- [12] Z. Jiang, L. Jin, Z. Han, W. Hu, Z. Zeng, Y. Sun, J. Xie, *Angew. Chem. Int. Ed.* **2019**, *58*, 11374.
- [13] S. Xia, X. Zhang, C. Liang, Y. Yu, W. Liu, *Energy Storage Mater.* **2020**, *24*, 329.
- [14] H. Chen, A. Pei, D. C. Lin, J. Xie, A. K. Yang, J. W. Xu, K. X. Lin, J. Y. Wang, H. S. Wang, F. F. Shi, D. Boyle, Y. Cui, *Adv. Energy Mater.* **2019**, *9*, 1900858.
- [15] Z. Peng, N. Zhao, Z. G. Zhang, H. Wan, H. Lin, M. Liu, C. Shen, H. Y. He, X. X. Guo, J. G. Zhang, D. Y. Wang, *Nano Energy* **2017**, *39*, 662.
- [16] J. Wu, Z. Rao, X. Liu, Y. Shen, L. Yuan, Z. Li, X. Xie, Y. Huang, *Adv. Funct. Mater.* **2020**, *31*, 2009961.
- [17] J. Chang, J. Shang, Y. Sun, L. K. Ono, D. Wang, Z. Ma, Q. Huang, D. Chen, G. Liu, Y. Cui, Y. Qi, Z. Zheng, *Nat. Commun.* **2018**, *9*, 4480.
- [18] W. Xue, Z. Shi, L. Suo, C. Wang, Z. Wang, H. Wang, K. P. So, A. Maurano, D. Yu, Y. Chen, L. Qie, Z. Zhu, G. Xu, J. Kong, J. Li, *Nat. Energy* **2019**, *4*, 374.
- [19] Z. Y. Wang, Z. X. Lu, W. Guo, Q. Luo, Y. H. Yin, X. B. Liu, Y. S. Li, B. Y. Xia, Z. P. Wu, *Adv. Mater.* **2021**, *33*, 2006702.
- [20] B. Yu, Y. Fan, S. Mateti, D. Kim, C. Zhao, S. Lu, X. Liu, Q. Rong, T. Tao, K. K. Tanwar, X. Tan, S. C. Smith, Y. I. Chen, *ACS Nano* **2021**, *15*, 1358.
